# Supplementary material for: Treatment patterns and survival outcomes for patients with non-small cell lung cancer in the UK in the preimmunology era: a REAL-Oncology database analysis from the I-O Optimise initiative
Source: PubMed Central journal article supplement — BMJ Open. 2021 Sep 15;11(9):e046396. doi: 10.1136/bmjopen-2020-046396 (PMC8444261; doi:10.1136/bmjopen-2020-046396), 2021-09-15
Supplement: bmjopen-2020-046396supp001.pdf [file bmjopen-2020-046396supp001.pdf]

**SUPPLEMENTARY FILE****Treatment patterns and survival outcomes for patients with non-small cell lung cancer in the United Kingdom in the pre-immunology era: a REAL-Oncology database analysis from the I-O Optimise initiative**

Michael Snee (ORCID ID: 0000-0001-6583-2113),<sup>1</sup> Sue Cheeseman,<sup>2</sup> Matthew Thompson,<sup>2</sup> Majid Riaz,<sup>2</sup> Will Sopwith,<sup>2</sup> Laure Lacoïn,<sup>3,4</sup> Carlos Chaib,<sup>5</sup> Melinda J Daumont ([ORCID ID: 0000-0002-4319-1498](https://orcid.org/0000-0002-4319-1498)),<sup>3</sup> John R. Penrod,<sup>6</sup> Geoff Hall<sup>1,7</sup>

<sup>1</sup>Leeds Cancer Centre, The Leeds Teaching Hospitals NHS Trust, Leeds, UK

<sup>2</sup>REAL Oncology, The Leeds Teaching Hospitals NHS Trust, Leeds, UK

<sup>3</sup>Worldwide Health Economics & Outcomes Research, Bristol Myers Squibb, Braine-l'Alleud, Belgium

<sup>4</sup>Epi-Fit, Bordeaux, Nouvelle-Aquitaine, France

<sup>5</sup>Research & Development Medical Affairs, Bristol Myers Squibb, Madrid, Spain

<sup>6</sup>Worldwide Health Economics & Outcomes Research, Bristol Myers Squibb, Princeton, NJ, USA

<sup>7</sup>Leeds Institute for Data Analytics, University of Leeds, UK

**Corresponding author:** Dr Michael Snee, Clinical Advisor, Leeds Cancer Centre, Leeds Teaching Hospital NHS Trust, Beckett Street, Leeds, LS9 7TF, UK. Tel: +44(0)1132067614. Email: [m.snee@nhs.net](mailto:m.snee@nhs.net)

**SUPPLEMENTARY APPENDIX****Appendix****Table S1.** ICD-O-3 morphology codes for NSCLC.

| Morphology code                            | Type of NSCLC                                                                                       |
|--------------------------------------------|-----------------------------------------------------------------------------------------------------|
| <b>Adenocarcinoma (non-squamous NSCLC)</b> |                                                                                                     |
| 81403                                      | Adenocarcinoma UNS                                                                                  |
| 81443                                      | Enteric adenocarcinoma                                                                              |
| 82303                                      | Solid adenocarcinoma with mucin production                                                          |
| 82443                                      | MANEC mixed adenoneuroendocrine carcinoma                                                           |
| 82500                                      | Atypical adenomatous hyperplasia                                                                    |
| 82502                                      | Adenocarcinoma in situ, non-mucinous                                                                |
| 82503                                      | Adenocarcinoma, bronchiolo-alveolar (BAC), bronchiolar carcinoma, (incl pathologic in situ-variant) |
| 82523                                      | Bronchiolo-alveolar carcinoma                                                                       |
| 82532                                      | Adenocarcinoma in situ, mucinous                                                                    |
| 82533                                      | Adenocarcinoma, mucinous bronchiolo-alveolar (BAC)                                                  |
| 82543                                      | Bronchiolo-alveolar carcinoma, mixed mucinous and non-mucinous                                      |

| Morphology code                | Type of NSCLC                                                                                    |
|--------------------------------|--------------------------------------------------------------------------------------------------|
| 82553                          | Adenocarcinoma, mixed with other types of carcinoma incl. squamous cell and small-cell carcinoma |
| 82563                          | Minimally invasive adenocarcinoma, non-mucinous                                                  |
| 82573                          | Minimally invasive adenocarcinoma, mucinous                                                      |
| 82603                          | Papillary adenocarcinoma, NOS                                                                    |
| 82653                          | Micropapillary adenocarcinoma                                                                    |
| 83103                          | Clear cell adenocarcinoma                                                                        |
| 83333                          | Fetal adenocarcinoma                                                                             |
| 84703                          | Mucinous cystadenocarcinoma                                                                      |
| 84803                          | Mucinous adenocarcinoma                                                                          |
| 84903                          | Signet ring cell carcinoma                                                                       |
| 85503                          | Acinar cell carcinoma                                                                            |
| 85513                          | Acinar adenocarcinoma                                                                            |
| <b>Squamous cell carcinoma</b> |                                                                                                  |
| 80523                          | Papillary squamous cell carcinoma                                                                |
| 80702                          | Squamous cell carcinoma in situ                                                                  |
| 80703                          | Squamous cell carcinoma                                                                          |

| Morphology code                                                         | Type of NSCLC                                        |
|-------------------------------------------------------------------------|------------------------------------------------------|
| 80713                                                                   | Keratinizing squamous cell carcinoma                 |
| 80723                                                                   | Non-keratinizing squamous cell carcinoma             |
| 80733                                                                   | Squamous cell carcinoma, small cell non-keratinizing |
| 80833                                                                   | Basaloid squamous cell carcinoma                     |
| 80843                                                                   | Squamous cell carcinoma, clear cell type             |
| <b>NSCLC NOS</b>                                                        |                                                      |
| 80103                                                                   | Carcinoma, NOS                                       |
| 80203                                                                   | Carcinoma, undifferentiated NOS                      |
| 80213                                                                   | Carcinoma, anaplastic NOS                            |
| 80463                                                                   | Carcinoma, non-small cell unspecified                |
| <b>Large cell carcinoma (non-squamous NSCLC)</b>                        |                                                      |
| 80123                                                                   | Large-cell carcinoma, unspecified                    |
| <b>Neuroendocrine NSCLC carcinoma (other specified NSCLC carcinoma)</b> |                                                      |
| 80133                                                                   | Large cell neuroendocrine carcinoma                  |
| 82463                                                                   | Neuroendocrine carcinoma, NOS                        |
| <b>Other miscellaneous NSCLC (other specified NSCLC carcinoma)</b>      |                                                      |

| Morphology code | Type of NSCLC                                |
|-----------------|----------------------------------------------|
| 80143           | Large cell carcinoma with rhabdoid phenotype |
| 80223           | Sarcomatoid carcinoma, pleomorphic           |
| 80233           | NUT carcinoma                                |
| 80303           | Spindle cell and giant cell carcinoma        |
| 80313           | Giant cell carcinoma                         |
| 80323           | Spindle cell carcinoma, NOS                  |
| 80333           | Pseudosarcomatous carcinoma                  |
| 81233           | Basaloid carcinoma                           |
| 82003           | Adenocystic carcinoma                        |
| 84303           | Mucoepidermoid carcinoma                     |
| 85603           | Adenosquamous carcinoma                      |
| 85623           | Epithelial-myoepithelial carcinoma           |
| 89723           | Blastoma, pulmonary (pneumoblastoma)         |
| 89803           | Carcinosarcoma, NOS                          |
| 89823           | Myoepithelial carcinoma                      |

ICD-O-3, *International Classification of Diseases for Oncology*, 3rd Edition; NOS, not otherwise specified; NSCLC, non-small cell lung cancer; UNS, unspecified.

**Table S2.** Initial treatment algorithm. Initial treatment was defined as the first treatment received within 6 months of diagnosis, associated with any other treatment received within a certain time period following first treatment as defined in the table below.

| Initial treatment category                                               | Definitions                                                                                                                                                                     |
|--------------------------------------------------------------------------|---------------------------------------------------------------------------------------------------------------------------------------------------------------------------------|
| A. Surgery                                                               | Sum of all A sub-groups                                                                                                                                                         |
| A0. Surgery only                                                         | Surgery + no SACT or RT within 12 weeks after surgery                                                                                                                           |
| A1. Surgery + adjuvant SACT (only) – no RT within 6 months of SACT start | Surgery + identification of SACT only (start) within 84 days (12 weeks) after surgery                                                                                           |
| A2. Surgery + adjuvant RT (only) – no SACT within 6 months of RT start   | Surgery + identification of RT only (start) within 84 days (12 weeks) after surgery                                                                                             |
| A3. Surgery + adjuvant RT and SACT                                       | Surgery + identification of RT [or SACT] (start) within 84 days (12 weeks) after surgery + identification of SACT [or RT] (start) within 180 days (6 months) after RT [or SACT] |

|                                       |                                                                                                                                                                                                          |
|---------------------------------------|----------------------------------------------------------------------------------------------------------------------------------------------------------------------------------------------------------|
| A4. Neoadjuvant SACT + surgery        | SACT + identification of surgery within 120 days (4 months) after first SACT regimen start + no RT identification prior to surgery<br><br>AND:                                                           |
| A5. Neoadjuvant RT + surgery          | RT + identification of surgery within 90 days (3 months) after first RT treatment start + no SACT identification prior to surgery AND:                                                                   |
| A6. Neoadjuvant SACT and RT + surgery | RT and SACT + identification of surgery within 3 months after start + identification of SACT and RT prior to surgery<br><br>Note: Neoadjuvant SACT and RT corresponds to RT within 6 weeks of SACT start |
| B. Radiotherapy alone                 | RT + no SACT nor surgery within 90 days (3 months) after RT                                                                                                                                              |
| C. SACT + Radiotherapy                | Sum of C1, C2 and C3                                                                                                                                                                                     |
| C1. RT followed by SACT               | RT + identification of SACT within 90 days (3 months) after first SACT regimen start + no surgery within 6 months after first SACT start                                                                 |

|                               |                                                                                                                                          |
|-------------------------------|------------------------------------------------------------------------------------------------------------------------------------------|
| C2. SACT followed by RT       | SACT + identification of RT within 90 days (3 months) after first SACT regimen start + no surgery within 6 months after first SACT start |
| C3. Concurrent chemoradiation | SACT + [start RT within 6 weeks of SACT] + no surgery within 3 months after chemoradiation                                               |
| D. SACT alone                 | SACT + no RT nor surgery within 90 days (3 months) after first SACT regimen start                                                        |
| E. Not treated                | No SACT, surgery or RT identified over entire follow-up period                                                                           |

RT, radiotherapy; SACT, systemic anticancer therapy

**Table S3:** OS in patients diagnosed with NSCLC in 2007–2012 and 2013–2017 by stage and pathological subtype

| Substratification | N   | Median OS | Q1–Q3     | 1-year |                  | 3-year |                   | 5-year |                  |
|-------------------|-----|-----------|-----------|--------|------------------|--------|-------------------|--------|------------------|
|                   |     | (months)  | (months)  | n      | OS (95% CI)      | n      | OS (95% CI)       | n      | OS (95% CI)      |
| Stage I           |     |           |           |        |                  |        |                   |        |                  |
| NSQ 2007–2012     | 64  | 55.27     | 24.8–98.5 | 58     | 0.91 (0.84–0.98) | 37     | 0.58 (0.47– 0.71) | 25     | 0.43 (0.32–0.57) |
| NSQ 2013–2017     | 159 | NA        | 34.2–NA   | 123    | 0.90 (0.86–0.95) | 44     | 0.72 (0.64–0.81)  | <6     | 0.51 (0.37–0.72) |
| SQ 2007–2012      | 58  | 37.28     | 18.5–66.8 | 46     | 0.79 (0.70–0.90) | 29     | 0.50 (0.39–0.65)  | 16     | 0.28 (0.18–0.42) |
| SQ 2013–2017      | 69  | 51.13     | 32.6–NA   | 55     | 0.85 (0.77–0.94) | 24     | 0.73 (0.61–0.86)  | <6     | 0.32 (0.13–0.81) |
| CDUP 2007–2012    | 128 | 16.72     | 5.8–33.1  | 76     | 0.59 (0.51–0.69) | 25     | 0.20 (0.14 –0.28) | 11     | 0.09 (0.05–0.16) |
| CDUP 2013–2017    | 189 | 20.90     | 8.0–40.3  | 97     | 0.66 (0.60–0.74) | 17     | 0.27 (0.19–0.38)  | <6     | 0.10 (0.04–0.28) |
| Stage II          |     |           |           |        |                  |        |                   |        |                  |
| NSQ 2007–2012     | 61  | 34.27     | 10.6–80.0 | 41     | 0.68 (0.58–0.81) | 27     | 0.45 (0.34–0.60)  | 18     | 0.31 (0.21–0.46) |
| NSQ 2013–2017     | 51  | 26.43     | 10.2–58.0 | 30     | 0.72 (0.60–0.85) | 12     | 0.42 (0.30–0.61)  | 0      | –                |
| SQ 2007–2012      | 58  | 17.20     | 8.6–58.2  | 36     | 0.62 (0.51–0.76) | 18     | 0.31 (0.21–0.46)  | 14     | 0.24 (0.15–0.38) |
| SQ 2013–2017      | 74  | 19.87     | 7.2–53.9  | 45     | 0.66 (0.55–0.77) | 15     | 0.42 (0.31–0.57)  | 0      | –                |
| CDUP 2007–2012    | 81  | 8.93      | 2.9–16.8  | 27     | 0.33 (0.24–0.45) | 11     | 0.14 (0.08–0.24)  | 7      | 0.09 (0.04–0.18) |
| CDUP 2013–2017    | 55  | 11.33     | 5.4–26.9  | 25     | 0.50 (0.38–0.65) | <6     | 0.09 (0.03–0.31)  | 0      | –                |

| Stage IIIA     |     |       |          |    |                  |    |                  |    |                  |
|----------------|-----|-------|----------|----|------------------|----|------------------|----|------------------|
| NSQ 2007–2012  | 51  | 9.93  | 6.5–38.6 | 23 | 0.45 (0.33–0.61) | 14 | 0.27 (0.18–0.43) | 9  | 0.18 (0.10–0.32) |
| NSQ 2013–2017  | 57  | 23.97 | 10.6–NA  | 35 | 0.74 (0.63–0.87) | <6 | 0.35 (0.22–0.58) | 0  | –                |
| SQ 2007–2012   | 91  | 10.73 | 4.4–21.1 | 41 | 0.45 (0.36–0.57) | 12 | 0.13 (0.08–0.22) | 10 | 0.11 (0.06–0.20) |
| SQ 2013–2017   | 72  | 14.50 | 8.4–36.0 | 29 | 0.54 (0.43–0.68) | <6 | 0.21 (0.10–0.42) | 0  | –                |
| CDUP 2007–2012 | 77  | 5.77  | 1.5–11.0 | 16 | 0.21 (0.13–0.32) | <6 | 0.05 (0.02–0.13) | 0  | –                |
| CDUP 2013–2017 | 57  | 5.00  | 1.9– 7.5 | 7  | 0.20 (0.12–0.36) | 0  | –                | 0  | –                |
| Stage IIIB–IV  |     |       |          |    |                  |    |                  |    |                  |
| NSQ 2007–2012  | 345 | 4.07  | 1.3–10.5 | 68 | 0.20 (0.16–0.25) | 19 | 0.06 (0.04–0.09) | 11 | 0.03 (0.02–0.06) |
| NSQ 2013–2017  | 321 | 5.00  | 1.7–12.9 | 72 | 0.26 (0.21–0.31) | 8  | 0.06 (0.04–0.11) | 0  | –                |
| SQ 2007–2012   | 229 | 5.33  | 2.2–12.0 | 56 | 0.24 (0.19–0.31) | 12 | 0.05 (0.03–0.09) | 8  | 0.04 (0.02–0.07) |
| SQ 2013–2017   | 167 | 4.80  | 2.4–11.9 | 37 | 0.25 (0.19–0.32) | 6  | 0.08 (0.04–0.15) | 0  | –                |
| CDUP 2007–2012 | 370 | 1.23  | 0.4–3.2  | 30 | 0.08 (0.06–0.11) | 8  | 0.02 (0.01–0.05) | <6 | 0.01 (0.00–0.02) |
| CDUP 2013–2017 | 323 | 1.23  | 0.4–3.4  | 14 | 0.06 (0.04–0.09) | <6 | 0.01 (0.00–0.04) | 0  | –                |

CDUP, clinically diagnosed with unknown pathology; NSCLC, non-small cell lung cancer; NSQ, non-squamous cell carcinoma; OS, overall survival; SQ, squamous cell carcinoma
